# Supplementary material for: Outcompeting p53-Mutant Cells in the Normal Esophagus by Redox Manipulation
Source: Cell Stem Cell. 2019 Sep 5;25(3):329–341.e6. doi: 10.1016/j.stem.2019.06.011 (PMC6739485; doi:10.1016/j.stem.2019.06.011)
Supplement: Document S1. Figures S1–S6 and Tables S1 and S2 [file mmc1.pdf]

**Cell Stem Cell, Volume 25**

**Supplemental Information**

**Outcompeting *p53*-Mutant Cells  
in the Normal Esophagus  
by Redox Manipulation**

**David Fernandez-Antoran, Gabriel Piedrafita, Kasumi Murai, Swee Hoe Ong, Albert Herms, Christian Frezza, and Philip H. Jones**

Supplemental Material for:

## **Outcompeting p53-mutant cells in normal esophagus by redox manipulation**

David Fernandez-Antoran, Gabriel Piedrafita, Kasumi Murai, Swee Hoe Ong, Albert Herms, Christian Frezza, Philip H. Jones

This PDF file includes:

### **Supplementary Figures and Legends**

**Figure S1.** Related to Figures 2, 5 and 6

**Figure S2.** Related to Figure 2

**Figure S3.** Related to Figure 2

**Figure S4.** Related to Figures 2 and 3

**Figure S5.** Related to Figure 5

**Figure S6.** Related to Figure 6

### **Supplementary Tables and Data**

**Table S1, related to Figures 3 and 5:** Number of quantified mitochondria in Figure 3 and Figure 5

**Table S2, related to Figures 2,3,4, 5, 6:** Number of quantified clones per condition per time point in Figures 2, 4, 5, 6 and Figure S3.

# Supplementary Figures and Legends

## Figure S1

**A**

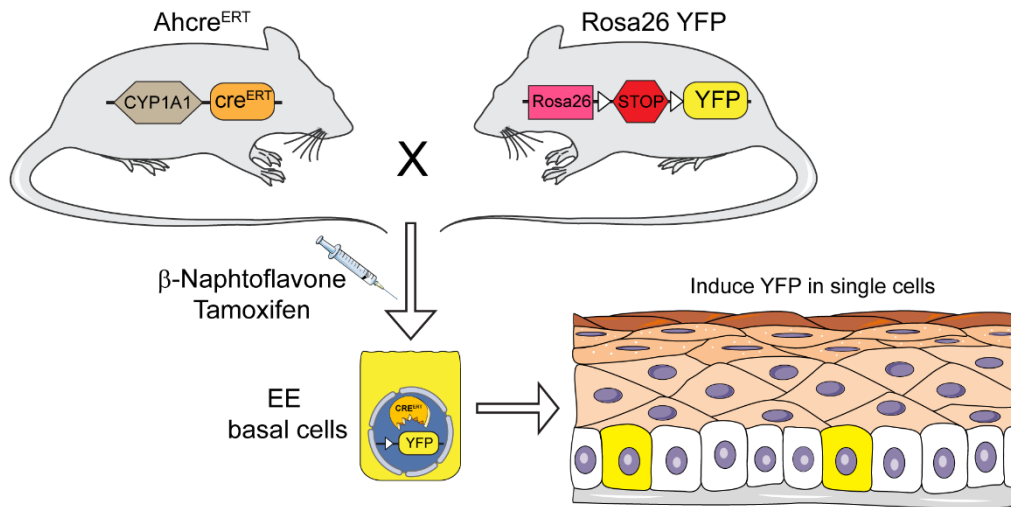

**B**

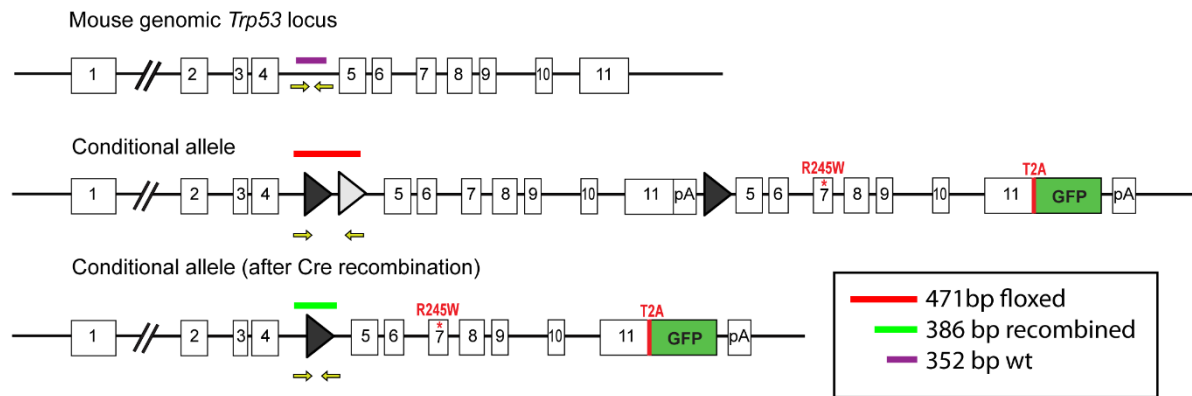

**C**

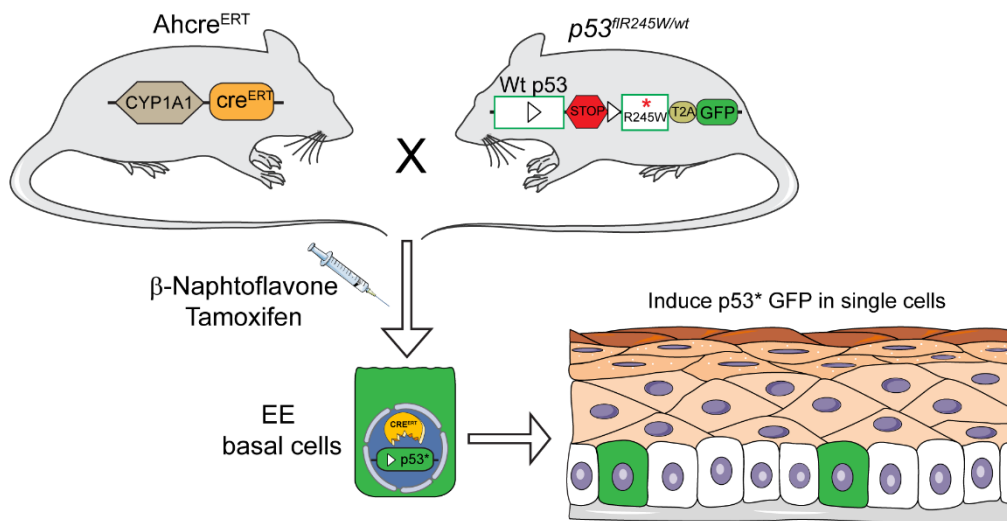

**Figure S1. Transgenic mouse models. Related to Figures 2, 5 and 6.**

(A) Generation of double transgenic *Ahcre<sup>ERT</sup>R26<sup>flEYFP/wt</sup>*, (*RYFP*) mice for lineage cell tracing experiments. *Yfp* (yellow) is targeted to the *Rosa26* locus downstream of a 'stop' cassette (red). Following *cre* induction, the stop cassette is excised and YFP protein expressed in a small proportion of esophageal basal cells. (B) Gene targeting strategy for generation of *p53<sup>R245W-GFP</sup>* mice, in which a conditional mutant allele of *Trp53<sup>R245W</sup>* (*p53\**) linked to the reporter protein GFP is targeted to the *Trp53* locus (Murai et al., 2018). (C) Generation of *Ahcre<sup>ERT</sup> p53\** mice. Following *cre* induction, *Trp53* wild type exons 5 to 11 are excised and *p53\** mutant allele and GFP reporter protein are expressed in a small proportion of oesophageal basal cells.

**Figure S2**

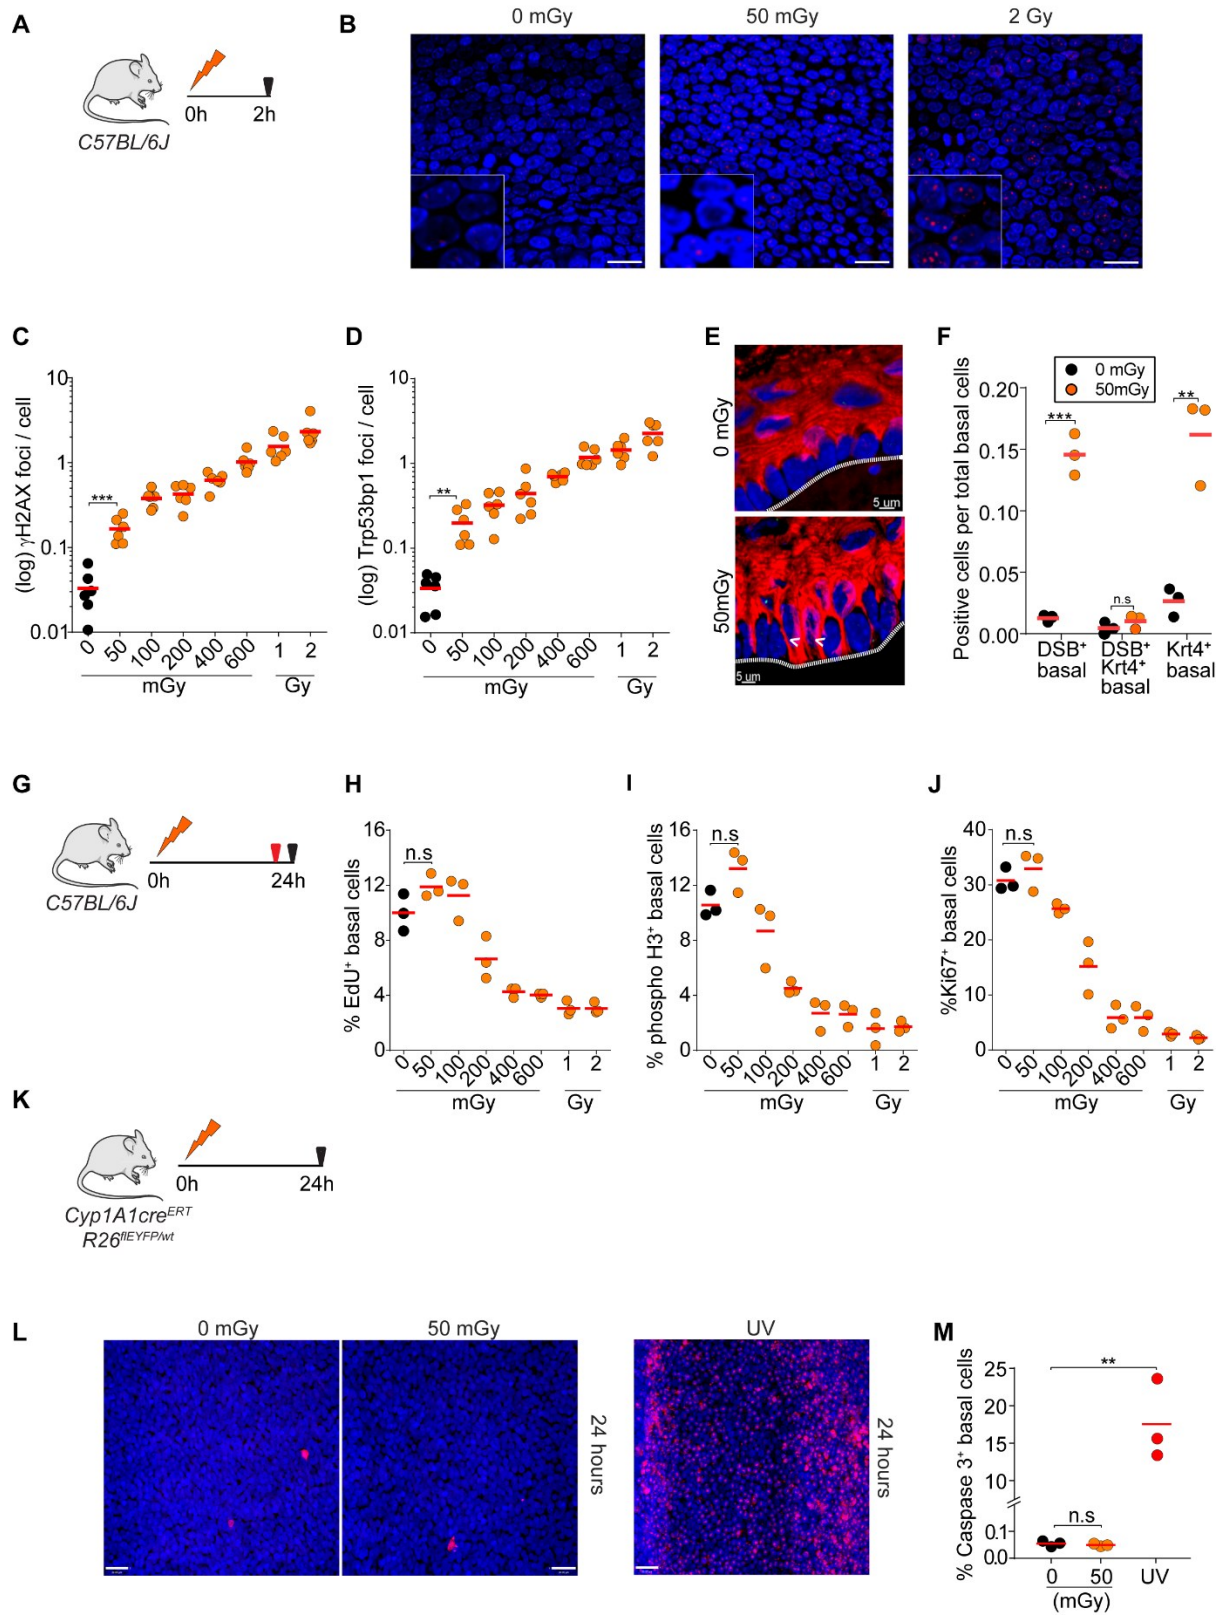

**Figure S2. Dose response of EE to whole body ionizing radiation. Related to Figure 2.**

(A) Protocol to study DNA damage dose response of basal cells in EE. Wild type *C57BL/6J* mice were irradiated and tissue collected 2 hours later. (B) Top down views of confocal z stacks of *Cyp1A1cre<sup>ERT</sup> Rosa26<sup>flEYFP/wt</sup>* mice EE wholemounts stained for DNA (DAPI, blue) showing nuclear foci  $\gamma$ H2AX (double strand DNA break marker, red) 2 hours after 0 mGy, 50 mGy or 2Gy exposures. DAPI (blue). Scale bars, 20  $\mu$ m. (C and D) Nuclear foci/basal cell of  $\gamma$ H2AX (C) and *Trp53bp1* (D) after whole body irradiation with doses shown. At least 250 basal cells per mouse in 6 mice at each dose were analyzed by confocal imaging. \*\*\* $p < 0.001$  and \*\* $p < 0.01$  (unpaired t test). (E) OCT embedded 10  $\mu$ m thickness cryosections of EE of *Cyp1A1<sup>creERT</sup> Rosa26<sup>flEYFP/wt</sup>* 2 hours after 0 mGy or 50 mGy LDIR. Krt4 (red), *Trp53bp1* (DSB, green) and DAPI (blue). Dashed lines indicate basement membrane. Arrowheads show Krt4 positive basal cells. Scale bars, 5 $\mu$ m. (F) Quantification of DSB<sup>+</sup>, DSB<sup>+</sup> Krt4<sup>+</sup> and Krt4<sup>+</sup> basal cells shown in (E). Points are mean values from individual mice. \*\*\* $p < 0.001$ , \*\* $p < 0.01$ , n.s not significant, (unpaired t test),  $n = 3$  mice per condition. (G) Protocol to study the effect of ionizing radiation on cell proliferation. Wild-type *C57BL/6J* mice were irradiated as in (A) and culled 24 hours later. One hour before culling, animals were injected with EdU intraperitoneally. (H-J) Percentage of basal cells positive for the proliferation markers, EdU (H) phospho-Histone 3 (I) and Ki67 (J), 24 hours after exposure to different doses of ionizing radiation. 3 mice per condition were analyzed by confocal imaging. n.s not significant (unpaired t test). (K-M) Apoptosis *in vivo* assay after LDIR. (K) Experimental protocol. *Cyp1A1cre<sup>ERT</sup> Rosa26<sup>flEYFP/wt</sup>* mice were irradiated with 0 or 50 mGy LDIR and EE stained 24 hours after LDIR exposure. As a positive control tissue was exposed to ultraviolet radiation and maintained in explant culture for 24 hours prior to staining (Clayton et al., 2007). (L) Confocal images of basal layer of EE stained for activated Caspase 3 (red) and DAPI (blue). Scale bars, 30  $\mu$ m. (M) Quantification of the percentage of Caspase 3<sup>+</sup> cells shown in (J). At least 3000 basal cells in 3 mice were analyzed per condition by confocal imaging. \*\*  $p < 0.01$ , n.s. not significant (unpaired t test).

**Figure S3**

**A EdU pulse lineage tracing**

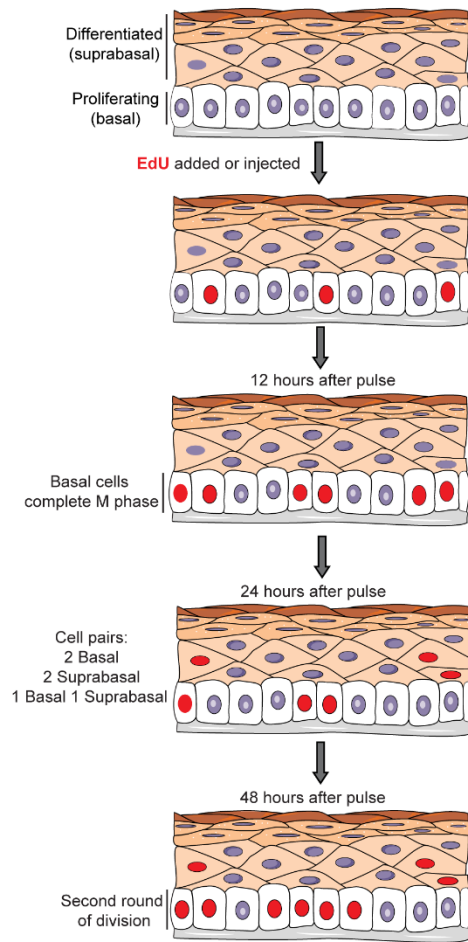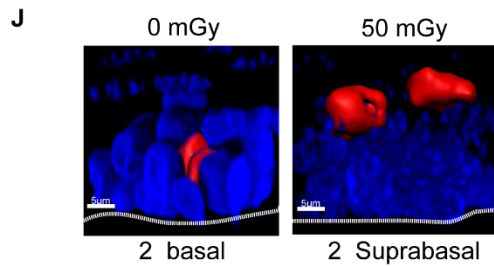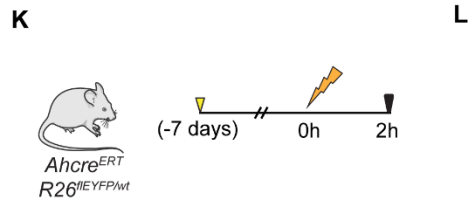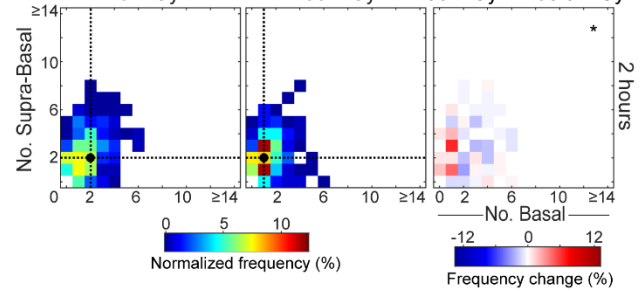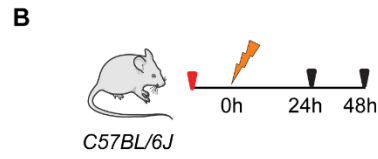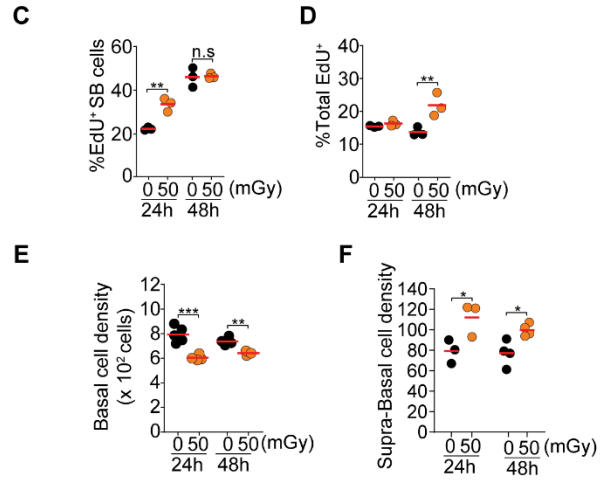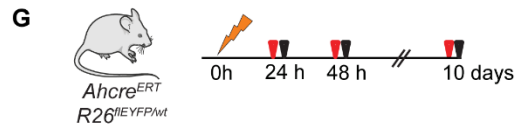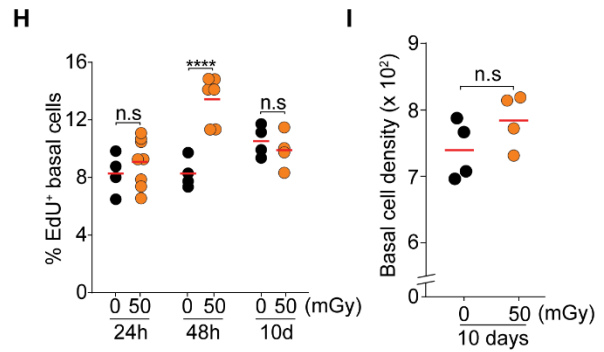

**Figure S3. EdU lineage tracing following low dose radiation. Related to Figure 2.**

(A) EdU pulse lineage cell tracing. Cartoon shows where EE EdU labelled cells (red) are located at different time points after EdU labelling. (B) Experimental protocol. Mice were given EdU 1 hour before irradiation (red triangle) to allow number and location of EdU<sup>+</sup> cells in EE to be tracked by imaging 24 and 48 hours post irradiation. (C-F) Percentage of EdU<sup>+</sup> suprabasal (C) EdU<sup>+</sup> total cells (D) basal cell density (E) and supra-basal cell density (F) 24 and 48 hours after 0 or 50 mGy LDIR. Points are mean values from individual mice. n=3, 4 or more mice per condition \*\*\*\* p<0.0001, \*\*\* p<0.001, \*\*p<0.01, \*p<0.05, n.s. not significant (unpaired t test). Total cells per condition in (C) was >4000, >6000 in (D) and (E) and >3500 basal cells in (F). (G) Experimental protocol. *Cyp1A1cre<sup>ERT</sup>Rosa26<sup>flIEYFP/wt</sup>* mice were irradiated with 0 or 50 mGy LDIR (black arrows) and were given EdU (red arrows) 1 hour before culling for each time point. EdU<sup>+</sup> basal cells were detected by confocal imaging. (H) Percentage of EdU<sup>+</sup> basal cells at time points shown in (G) \*\*\*\*p<0.0001, n.s. not significant, (unpaired t test). (I) Basal cell density (as number of cells per field of view) 10 days after 0 or 50 mGy LDIR. At least 2900 basal cells were quantified per condition in 4 mice per condition. (J) Rendered confocal z stacks showing side views of typical EdU<sup>+</sup> clones found after LDIR, containing two basal cells (for 0 mGy) and two suprabasal cells (for 50 mGy). EdU<sup>+</sup> (red), DAPI (blue). Dashed lines indicate basement membrane, scale bars, 5  $\mu$ m. (K) Experimental protocol: *cre* was induced 7 days before irradiation in *Cyp1A1cre<sup>ERT</sup>Rosa26<sup>flIEYFP/wt</sup>* reporter mice (RYFP), yellow arrow. Samples were collected at 2 hours post irradiation and clones size were analyzed. (L) Heat maps representing frequency of clones with the number of basal and supra-basal cells indicated and differences between 0 and 50 mGy irradiated animals (right hand panel) at 2 hours. Black dots and dashed lines indicate geometric median clone-size. \*p = 0.042 (Peacock's test). n = 300 clones per condition.

**Figure S4**

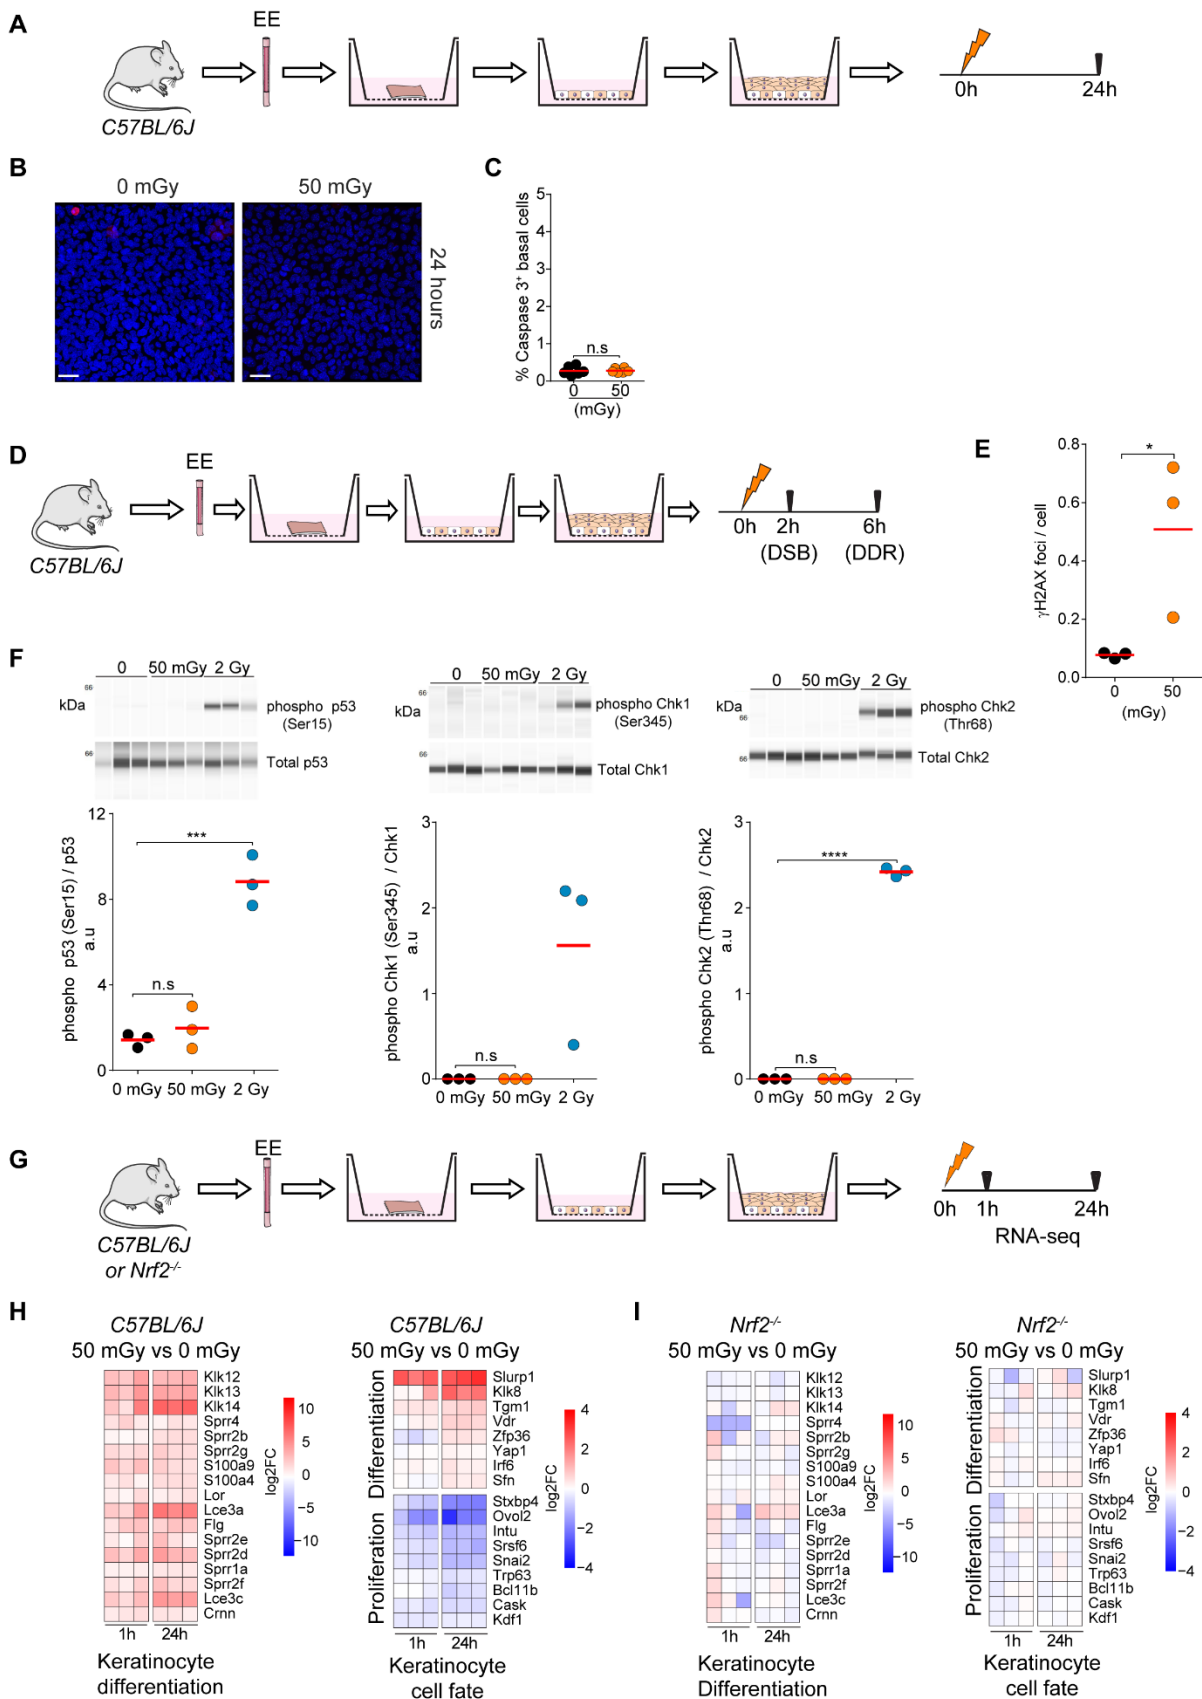

**Figure S4. Effects of 50mGy irradiation on primary esophageal 3D cultures. Related to Figures 2 and 3.**

(A) Experimental protocol. Primary mouse keratinocyte 3D cultures were irradiated with 0 or 50 mGy LDIR and analyzed for Caspase3<sup>+</sup> basal cells 24 hours later. (B) Top down views of confocal z stacks of typical *in vitro* primary keratinocyte 3D cultures from *C57BL/6J* mice stained for Caspase 3<sup>+</sup> (red). DAPI (blue). Scale bars, 30  $\mu$ m. (C) Percentage of Caspase 3<sup>+</sup> basal cells in (B). n.s not significant (unpaired t test). n=6 mice. (D) Experimental protocol. Cultures were irradiated with 0 or 50 mGy LDIR or 2Gy and stained with the double strand DNA break marker  $\gamma$ H2AX, 2 hours after irradiation. Staining visualized by confocal microscopy. (E) Number of  $\gamma$ H2AX foci per cell in primary keratinocyte 3D cultures from (D) \* p<0.05 (unpaired t-test). n= 3 mice per condition. At least 4000 basal cells per condition were quantified. (F) Quantitative immuno-capillary electrophoresis analysis of DNA damage response (DDR) pathway key phosphorylation events (phospho p53 Ser15, phospho CHK1 Ser345 and phospho CHK2 Thr68) for primary keratinocyte 3D cultures shown in (D) 6 hours after irradiation. 2 Gy irradiated samples were included as positive control of DDR pathway phosphorylation. n.s. not significant, \*\*\*\* p<0.0001, \*\*\* p<0.001 (unpaired t-test). n= 3 mice per condition. (G) Experimental protocol. 3D cultures from *C57BL/6J* and *Nrf2*<sup>-/-</sup> animals were irradiated with 0 or 50 mGy LDIR and total RNA was isolated from samples 1 hour and 24 hours after irradiation. (H and I) RNA-seq generated heat maps, performed on biological triplicate cultures, 1 and 24 hours after 50 mGy LDIR compared to 0 mGy, for *C57BL/6J* (H) and *Nrf2*<sup>-/-</sup> (I) focusing on transcripts with adjusted p<0.05, involved in keratinocyte differentiation (first panel), and keratinocyte cell fate regulation (second panel).

**Figure S5**

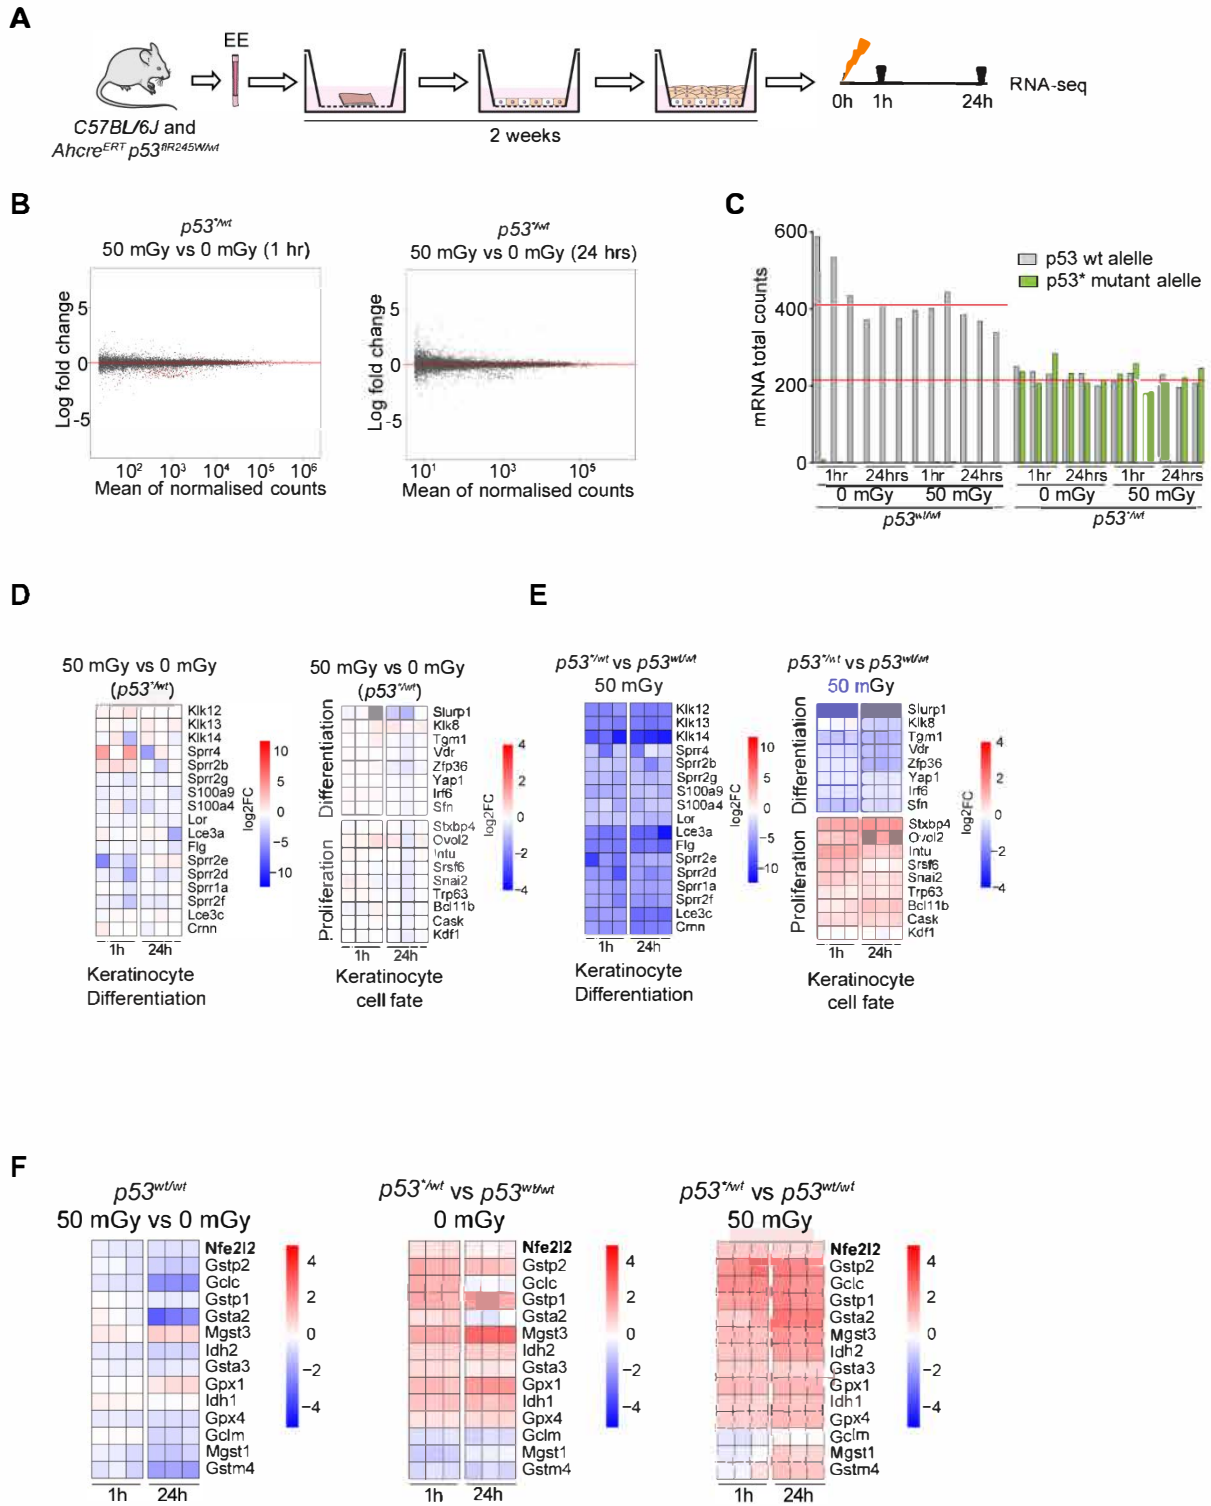

**Figure S5. Transcriptional profile of  $p53^{+/wt}$  primary esophageal 3D cultures after 50mGy LDIR. Related to Figure 5.**

(A) Protocol. Primary keratinocyte 3D cultures from *C57BL/6J* ( $p53^{wt/wt}$ ) and  $p53^{R245W-GFP/wt}$  ( $p53^{+/wt}$ ) mice were irradiated with 0 or 50 mGy LDIR and total RNA was isolated from samples 1 hour and 24 hours after irradiation. (B) MA plots of RNA-seq data of cultures from  $p53^{+/wt}$  mice, comparing irradiated and unirradiated cultures at times shown, red indicates transcripts with adjusted  $p < 0.05$ . (C) mRNA total counts (expression levels) from RNA-seq data for  $p53$  alleles in induced wild-type or  $p53^{+/wt}$  cultures. Bars indicate counts for  $p53$  wild type (grey) and  $p53^*$  (green) mRNAs, red lines show mean for each allele. (D and E) Heat maps from RNA-seq performed on  $p53^{+/wt}$  biological triplicate cultures, 1 and 24 hours after 50 mGy LDIR compared with 0 mGy (D), and  $p53^{+/wt}$  versus  $p53^{wt/wt}$  after 50 mGy LDIR (E) focusing on transcripts with adjusted  $p < 0.05$ , involved in keratinocyte differentiation and keratinocyte cell fate regulation. (F) RNA-seq generated heat maps, performed on  $p53^{wt/wt}$  and  $p53^{wt/+}$  3D cultures showing transcript expression differences with adjusted  $p < 0.05$  for the indicated comparisons, directly regulated by *Nrf2* (*Nfe2l2*).

**Figure S6**

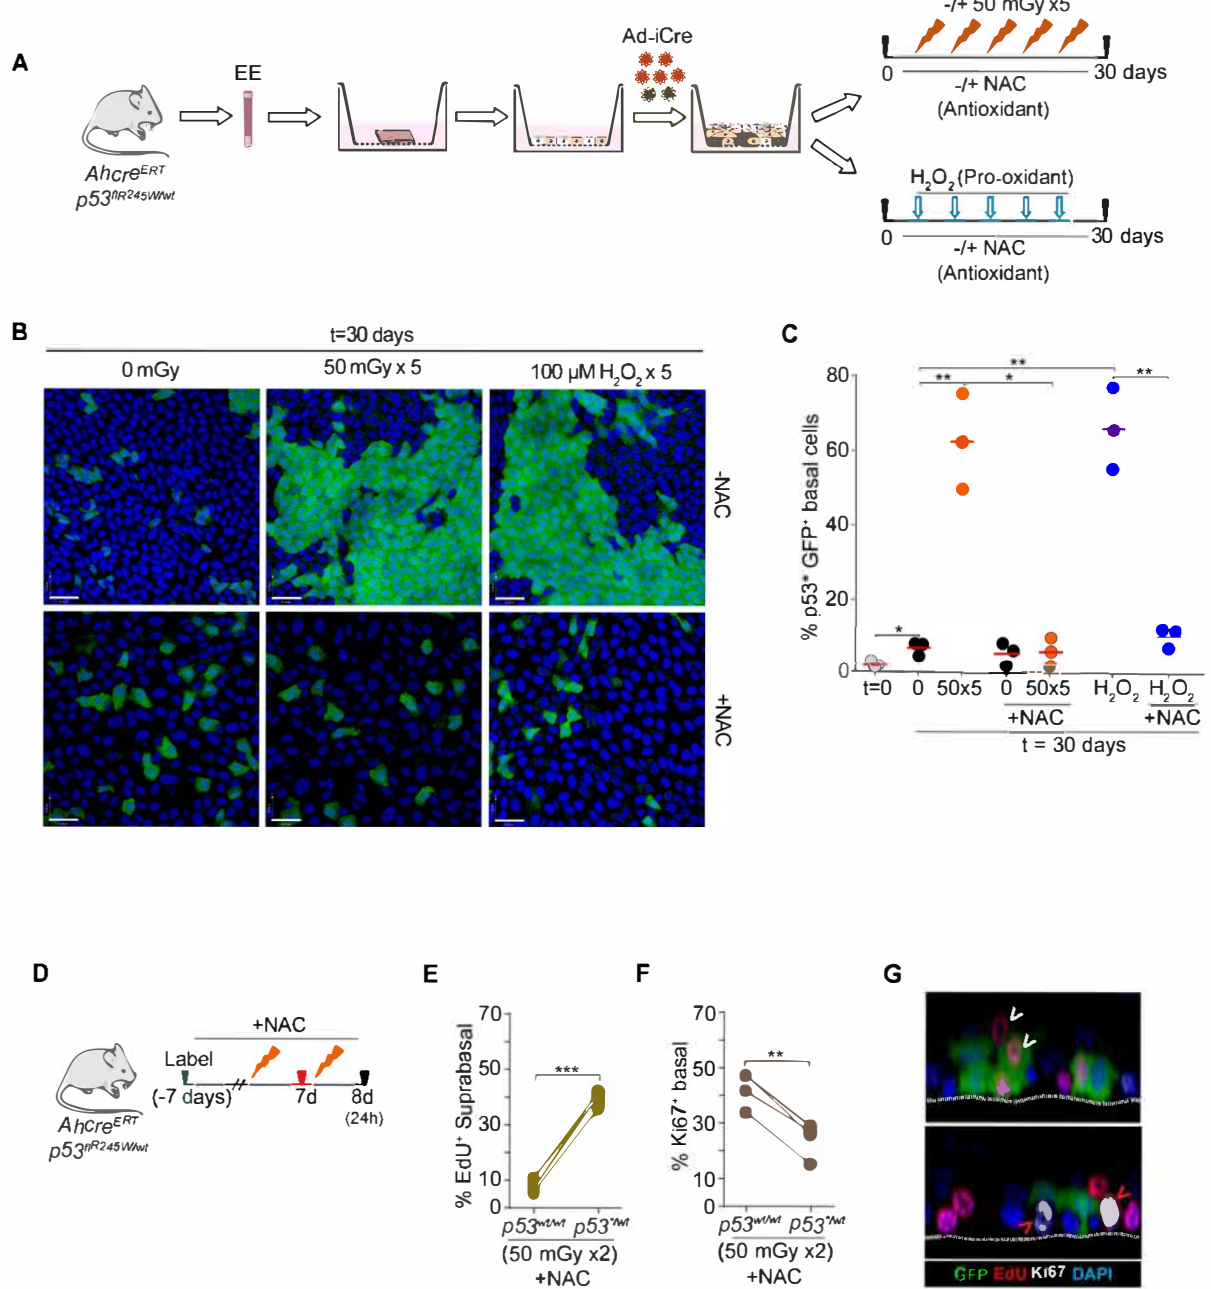

**Figure S6. Effects of 50mGy LDIR and antioxidant treatment on  $p53^{*}/wt$  and  $p53^{wt}/wt$  in vitro and in vivo. Related to Figure 6.**

(A) Experimental protocol. Primary keratinocyte 3D cultures from  $p53^{R245W-GFP}/wt$  mice were induced at clonal level by adenoviral cre infection and exposed to five doses of 50 mGy LDIR or five doses of 100 $\mu$ M H<sub>2</sub>O<sub>2</sub> with or without NAC treatment. (B) Top down views of confocal z stacks of primary 3D cultures described in (A) showing  $p53^{*}/wt$  clones (green), 30 days after different exposures and treatments. Basal layer cells are shown. DAPI (blue). Scale bars, 36  $\mu$ m.

(C) Percentage of  $p53^{*}/wt$  basal cells shown in (B). \*\*  $p < 0.01$ , \*  $p < 0.05$ , n.s  $p > 0.05$  (unpaired t-test). At least 2900 basal cells were quantified per condition.  $n = 3$  (independent cultures from different mice). (D)  $p53^{R245W-GFP}/wt$  mice ( $p53^{*}/wt$ ) were induced to give expression of  $p53^{*}$  in single cells. 7 days later, animals were irradiated with a course of 2 doses of 50 mGy LDIR over 2 weeks. (E and F) Percentage of EdU+ suprabasal cells, (E) and Ki67+ basal cells (F) 24 and 48 hours after 2 doses of 50 mGy in the presence of NAC, in  $p53^{wt}/wt$  and  $p53^{*}/wt$  areas within the same animal. Lines link same mouse. \*\*\* $p < 0.001$ , \*\*  $p < 0.01$  (paired t-test).  $n = 4$  mice per time point. At least 28000 basal cells were analyzed for each time point.

(G) Representative sections of EE whole mounts from  $p53^{*}/wt$  mice, 48 hours after 50 mGy LDIR in the presence of NAC, showing EdU+ suprabasal cells (red, marked with white arrows) in  $p53^{*}$  clones and Ki67+ basal cells (white, marked with red arrows) in adjacent  $p53^{wt}/wt$  cells.

## Supplementary Tables and Data

**Table S1: Related to Figures 3 and Figure S5.**

Fig. 3

Number of quantified mitochondria  
(see also data shown in Table S4).

| WT     | 0 mGy  | 50 mGy |
|--------|--------|--------|
| 5 min  | 238521 | 114768 |
| 30 min | 197460 | 105705 |
| 60 min | 52204  | 55347  |
| DTT    | 47347  |        |
| H2O2   | 75413  |        |

| WT     | 0 mGy | 0 mGy<br>+DTT | 50 mGy | 50<br>mGy+DTT |
|--------|-------|---------------|--------|---------------|
| 5 min  | 63477 | 50067         | 66319  | 66253         |
| 30 min | 48204 | 56192         | 64836  | 68113         |
| 60 min | 68880 | 43877         | 45182  | 62252         |

Fig.S5

Number of quantified mitochondria  
(see also data shown in Table S3).

|        | 0 mGy                      |                           | 50 mGy                     |                           |
|--------|----------------------------|---------------------------|----------------------------|---------------------------|
|        | <i>p53<sup>wt/wt</sup></i> | <i>p53<sup>*/wt</sup></i> | <i>p53<sup>wt/wt</sup></i> | <i>p53<sup>*/wt</sup></i> |
| 5 min  | 238521                     | 43491                     | 114768                     | 35301                     |
| 30 min | 197450                     | 103688                    | 105705                     | 14730                     |
| 60 min | 52204                      | 43243                     | 55347                      | 7171                      |
| DTT    | 47347                      | 30346                     |                            |                           |
| H2O2   | 75413                      | 18598                     |                            |                           |

**Table S2: Related to Figures 2, 4-6 and Figure S3.**

Number of quantified clones per condition per time point

*N*= Number of mice per condition per time point

| Figure 2D |       |        |
|-----------|-------|--------|
|           | 0 mGy | 50 mGy |
| 24h       | 1000  | 1000   |
| 48h       | 1530  | 1800   |

*N*=8

| Figure 4E |       |        |
|-----------|-------|--------|
|           | 0 mGy | 50 mGy |
| 24h       | 600   | 600    |
| 48h       | 600   | 600    |

*N*=4

| Figure 5C |       |           |
|-----------|-------|-----------|
|           | 0 mGy | 50 mGy x1 |
| 48h       | 150   | 450       |

*N*=4

| Figure 5H and 6E |       |              |
|------------------|-------|--------------|
|                  | 0 mGy | 50 mGy<br>x5 |
| -NAC             | 300   | 300          |
| +NAC             | 300   | 300          |

*N*=3

| Figure S3L |       |           |
|------------|-------|-----------|
|            | 0 mGy | 50 mGy x1 |
| 2 hours    | 300   | 300       |

*N*=3
